# Supplementary material for: Novel Benzothiazole-Based Highly Selective Ratiometric Fluorescent Turn-On Sensors for Zn2+ and Colorimetric Chemosensors for Zn2+, Cu2+, and Ni2+ Ions
Source: PubMed Central journal article supplement — ACS Omega. 2021 Sep 15;6(38):24473–83. doi: 10.1021/acsomega.1c02855 (PMC8482408; doi:10.1021/acsomega.1c02855), 2021-09-15
Supplement: ao1c02855_si_001.pdf [file ao1c02855_si_001.pdf]

# Novel Benzothiazole based Highly Selective Ratiometric Fluorescent *turn on* Sensor for Zn<sup>2+</sup> and Colorimetric Chemosensor for Zn<sup>2+</sup>, Cu<sup>2+</sup> and Ni<sup>2+</sup> Ions

Chinna Ayya Swamy Pothulapadu<sup>a\*</sup>, Anjitha Jayaraj<sup>a</sup>, Swathi N<sup>b</sup>, Ragam N Priyanka<sup>c</sup> and  
Gandhi Sivaraman<sup>d</sup>

<sup>a</sup>Main group Organometallics Materials, Supramolecular Chemistry and Catalysis lab,  
Department of Chemistry, National Institute of Technology, Calicut, India-673601.

<sup>b</sup>Maharani Lakshmi Ammanni College for women (autonomous), Bangalore, India-560012

<sup>c</sup>School of Chemical Sciences, Mahatma Gandhi University, Kottayam, India-686560.

<sup>d</sup>Department of Chemistry, Gandhigram Rural Institute (Deemed to be University),  
Gandhigram 624302, India

| Table of contents for supporting information                                                                                    | Page number |
|---------------------------------------------------------------------------------------------------------------------------------|-------------|
| 1. Methods and Materials                                                                                                        | S2-S4       |
| 2. Photophysical Properties                                                                                                     | S5-S9       |
| 3. <sup>1</sup> H and <sup>13</sup> C Nuclear Magnetic Resonance (NMR) and High-Resolution Mass<br>Spectroscopic (HRMS) studies | S10-S12     |
| 4. Density Functional Theory results                                                                                            | S13-S25     |

## 1. Methods and Materials

### 1.1 UV-visible and fluorescence titration

UV-Visible and fluorescence titration of **compound-1** was carried out in 1:1 mixture of CHCl<sub>3</sub> and DMSO solutions. **Compound-1** (1 mL, 1 × 10<sup>-5</sup> M) were placed in a cuvette and was titrated with incremental amount of metal ion (1×10<sup>-3</sup> M) solution in 1:1 mixture of CHCl<sub>3</sub> and DMSO solutions.

### 1.2 Details about the association constant<sup>1,2</sup>

**For compound Compound-1:**

Chloroform solution of compounds **compound-1** (1 mL, 1 × 10<sup>-5</sup> M) were placed in a cuvette and was titrated with incremental amount of metal ions (1×10<sup>-3</sup> M) solution in 1:1 ratio of H<sub>2</sub>O and DMSO. The changes associated with the absorption band at 410 nm were monitored. The calculation for compound **compound-1** is shown below.

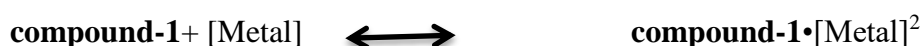

$$I = k_s[\text{compound-1}] + k_p[\text{compound-1} \cdot [\text{Metal}]^2]$$

$$I_0 = k_s[\text{compound-1}]_0$$

$$[\text{compound-1}]_0 = [\text{compound-1}] + [\text{compound-1} \cdot [\text{Metal}]^2]$$

$$K = [\text{compound-1} \cdot [\text{Metal}]^2] / [\text{compound-1}] [\text{Metal}]^2 \quad (K \text{ is association constant})$$

$$\begin{aligned} I/I_0 &= (k_s[\text{compound-1}] + k_p[[\text{Metal ion}]^2 \cdot \text{compound-1}]) / k_s[\text{compound-1}]_0 \\ &= (k_s[\text{compound-1}] + k_p[[\text{Metal ion}]^2 \cdot \text{compound-1}]) / k_s ([\text{compound-1}] + [\text{Metal ion} \cdot \text{compound-1}]) \end{aligned}$$

$$I/I_0 = (1 + (k_p/k_s) K[\text{Metal}]^2) / (1 + K[\text{Metal}]^2) \quad (1 - I/I_0) / [\text{Metal}]$$

$$k_p/k_s = \alpha \quad (\text{constant})$$

$$I/I_0 = (1 + \alpha K[\text{Metal}]^2) / (1 + K[\text{Metal}]^2)$$

$$1-I/I_0 = 1-(1+ \alpha K[\text{Metal}]^2) / (1+K[\text{Metal}]^2)$$

$$= (1+K[\text{Metal}]^2-1- \alpha K[\text{Metal}]) / (1+K[\text{Metal}]^2)$$

$$= (K[\text{Metal}]^2- \alpha K[\text{Metal}]) / (1+K[\text{Metal}]^2)$$

$$(1-I/I_0)*(1+K[\text{Metal}]^2) = K[\text{Metal}]^2- \alpha K[\text{Metal}]^2$$

$$(1-I/I_0) = K[\text{Metal}]^2 (I/I_0)- \alpha K[\text{Metal}]^2$$

$$(1-I/I_0)/ [\text{Metal}]^2 = K(I/I_0)- \alpha K$$

Here,  $I_0$  is initial absorbance of respective band,  $I$  is absorbance of respective band  $I$  upon addition of eqve of metal ions.

The association constant is obtained from the slope of  $(1 - I/I_0)/ [\text{Metal}]^2$  Vs  $I/I_0$  and are given in Table S1 (Figure 9).

$A = \epsilon Cl$ , here  $\epsilon$  = molar extension constant,  $C$  = concentration of sample,  $l$  = path length

$$= \epsilon l [C]$$

$$= K_s [C] \text{ for substrate}$$

$$= K_p [C] \text{ for product}$$

### **1.3 Calculation of Detection Limit**

The detection limit was calculated from the fluorescence quenching titration experiment. The intercept to X-axis (here  $\log[\text{metal}]$ ) was obtained by linear fitting of the  $(I_{\text{max}}-I)/(I_{\text{max}}-I_{\text{min}})$  vs  $\log[\text{metal}]$ , where  $I_{\text{max}}$ ,  $I$  and  $I_{\text{min}}$  are the initial fluorescence intensity, intensity at particular concentration and intensity at saturation point respectively. The detection limits were calculated by the formula,  $([\text{metal}] \times \text{MW of metal ions})/1000$  (multiplied by  $10^6$  to get the values in ppm), where MW [metal] is the molecular weight of metal.

### **1.4 Fluorescence quenching titration study:**

The fluorescence quenching experiments were carried in 1:1 ratio of  $\text{CHCl}_3$  and DMSO. The stock solution of **compound-1** is  $1 \times 10^{-5}$  M placing 1 mL quartz cuvette and followed metal ions  $1 \times 10^{-3}$  M were added gradually increasing amount. For each addition, at least three fluorescence spectrums were recorded repeatedly at 298 K to obtain a concordant value. **compound-1** were excited at 375 nm and the emission was monitored at 575 nm, whereas slit

width was kept 2 nm both source and detector through the experiment. Fluorescence quenching efficiency for each analyte was calculated by the following equation,

$$\eta = (I_0 - I) / I_0 \times 100\%$$

where,  $I_0$  is the initial intensity of the **Compound-1** and  $I$  is the intensity after the addition of a fixed volume of analytes.

Stern-Volmer constants ( $K_{SV}$ ) were obtained for both cases, **compound-1**, from  $I_0/I$  vs [metal ions] plots by fitting using Stern-Volmer equation,

$$I_0/I = 1 + K_{SV}[\text{metal ions}]$$

### **1.5 Fluorescence quantum yield**

The fluorescence quantum yield of molecules can be determined as the ratio of number of the photons emitted to the number of photons that are absorbed. The quantum yield of an ideal molecule is 1.0, which is the maximum efficiency. The quantum efficiency can be calculated by using the acute luminescence of standard sample whose emission or absorption spectrum falls in the region of the unknown compounds. The quantum efficiency of an unknown sample can be determined from the comparison of absorbance and emission area of standard sample with unknown compound, using the standard equation 1.

$$\phi_u = [(A_s F_u n_u^2) / (A_u F_s n_s^2)] \phi_s \quad (1)$$

Here the subscript u stands for unknown, s stands for known and  $\phi$  is quantum efficiency,  $A_s$  stands for absorbance of standard,  $A_u$  is the absorbance of unknown,  $F_s$  stands for integrated emission of standard,  $F_u$  is integrated emission of unknown and  $n$  is the refractive index of solvents used. Generally, absorbance of a standard and unknown sample should be similar or small which is around 0.1. Maximum quantum yield ( $\Phi$ ) of compounds, can be achieved either by designing a material with a rapid rate of radiative decay, or by minimizing competing nonradiative processes.

## 2. Photophysical Properties

**Table S1:** Photophysical data of **compound-1-1**, **S compound-1+Zn<sup>2+</sup>**, **compound-1+ Ni<sup>2+</sup>**, **compound-1+Cu<sup>2+</sup>** ions,

|                                              | <b>compound-1</b> | <b>compound-1-Zn<sup>2+</sup></b> | <b>compound-1-Ni<sup>2+</sup></b> | <b>compound-1-Cu<sup>2+</sup></b> |
|----------------------------------------------|-------------------|-----------------------------------|-----------------------------------|-----------------------------------|
| Association constant, K <sub>a</sub>         |                   | 4.9 x 10 <sup>11</sup>            | 1.6 x 10 <sup>11</sup>            | 6.0 x 10 <sup>10</sup>            |
| Quantum yield <sup>a</sup> ,<br><sup>b</sup> | 0.55              | 0.69                              | 0.07                              | 0.05                              |
| Quenching constant <sup>c</sup>              |                   | 2.0 x 10 <sup>5</sup>             | 5.6 x 10 <sup>5</sup>             | 2.4 x 10 <sup>5</sup>             |
| Quenching efficiency <sup>d</sup>            |                   | 69%                               | 98%                               | 96%                               |

b) Quantum yields are calculated using quinine sulphate (0.1 M in H<sub>2</sub>SO<sub>4</sub>, Φ<sub>F</sub> = 57.7%) solution as reference and using the following formula  $\Phi = \Phi_F \times I/I_R \times A_R/A \times \eta^2 / \eta R^2$  where Φ = quantum yield, I = intensity of emission, A = absorbance at λ<sub>ex</sub>, η = refractive index of solvent.

c) The quantum yields of compounds are determined in a 1:1 ratio of DMSO and CHCl<sub>3</sub> and the standard error is equal to the standard deviation of five independent measurements.

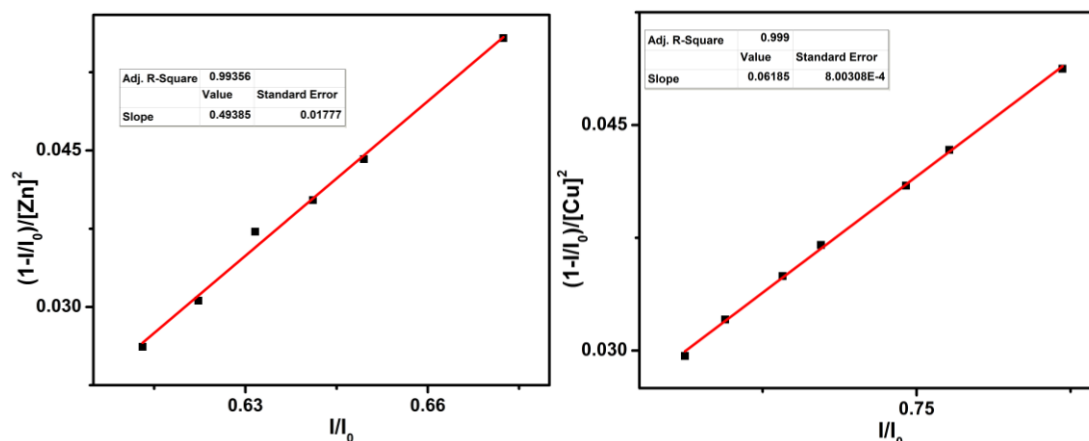

**Figure S1:** The  $I/I_0$  vs  $(1 - I/I_0)/[Metal]²$  plot for absorption titration data of **compound-1** with Zn<sup>2+</sup> (left) and Cu<sup>2+</sup> (right) ions in 1:1 ratio of DMSO and CHCl<sub>3</sub>

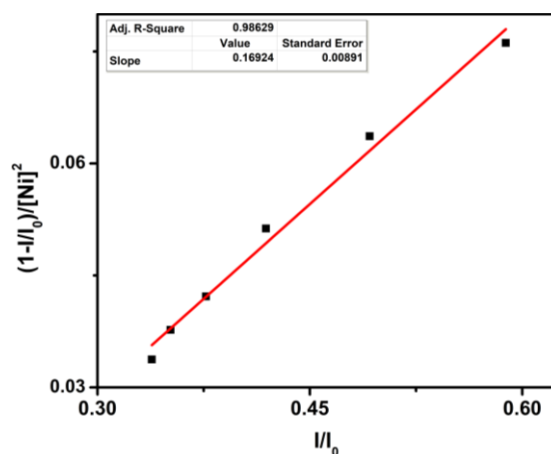

**Figure S2:** The  $I/I_0$  vs  $(1 - I/I_0)/[\text{Metal}]^2$  plot for absorption titration data of **compound-1** with  $\text{Ni}^{2+}$  ions in 1:1 ratio of DMSO and  $\text{CHCl}_3$

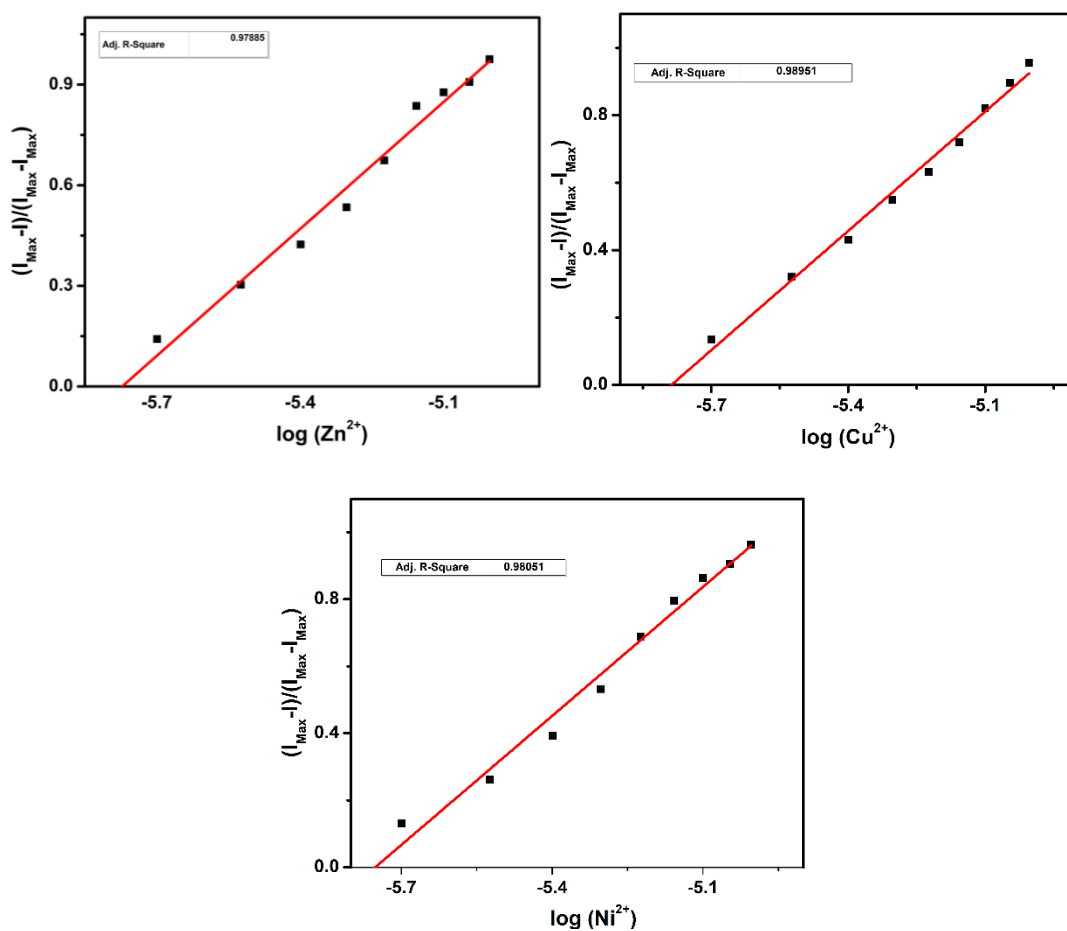

**Figure S3:**  $(I_{\text{max}} - I)/(I_{\text{max}} - I_{\text{min}})$  vs  $\log[\text{metal ions}]$  plots for **compound-1** with  $\text{Zn}^{2+}$  (top left),  $\text{Cu}^{2+}$  (top right) and  $\text{Ni}^{2+}$  (bottom) ions in 1:1 ratio of DMSO and  $\text{CHCl}_3$

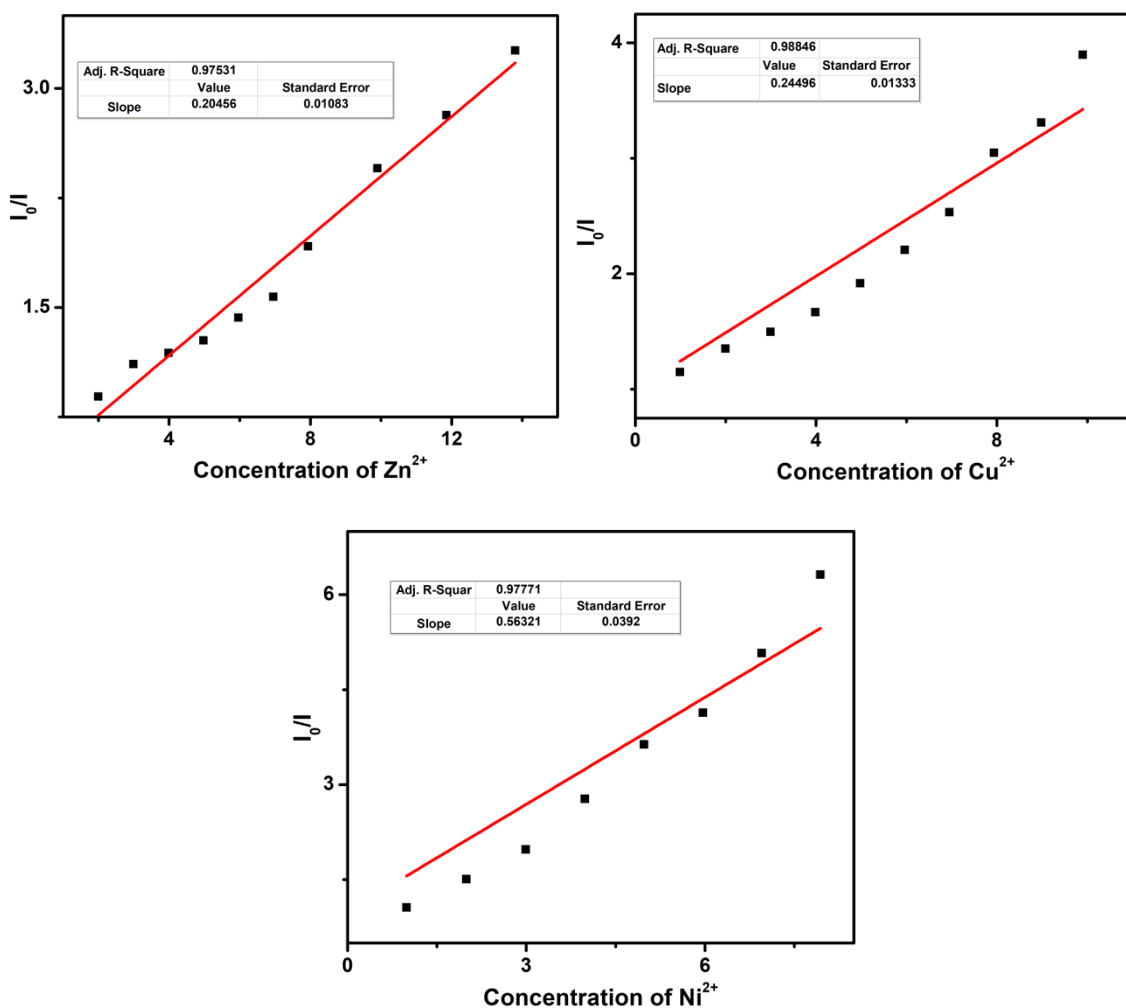

**Figure S4:** Stern-Volmer plots for **compound-1** with Zn<sup>2+</sup> (top left), Cu<sup>2+</sup> (top right) and Ni<sup>2+</sup> (bottom) ions in 1:1 ratio of DMSO and CHCl<sub>3</sub>

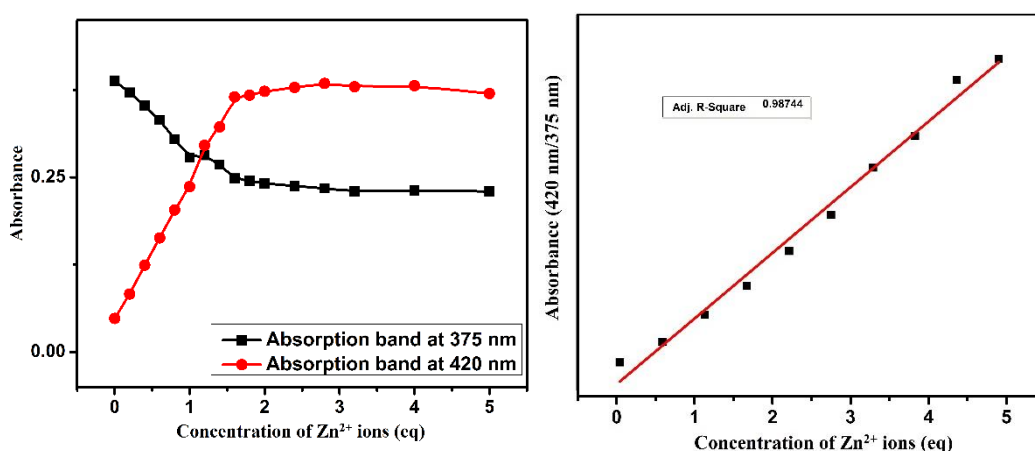

**Figure S5:** The compared absorption bands at 375 nm and 420 nm, which indicates the ratiometric response towards Zn<sup>2+</sup> ions (left) and linear fitting between the ratio of 420 nm/375 nm absorption bands and upon incremental of concentration of Zn<sup>2+</sup> ions

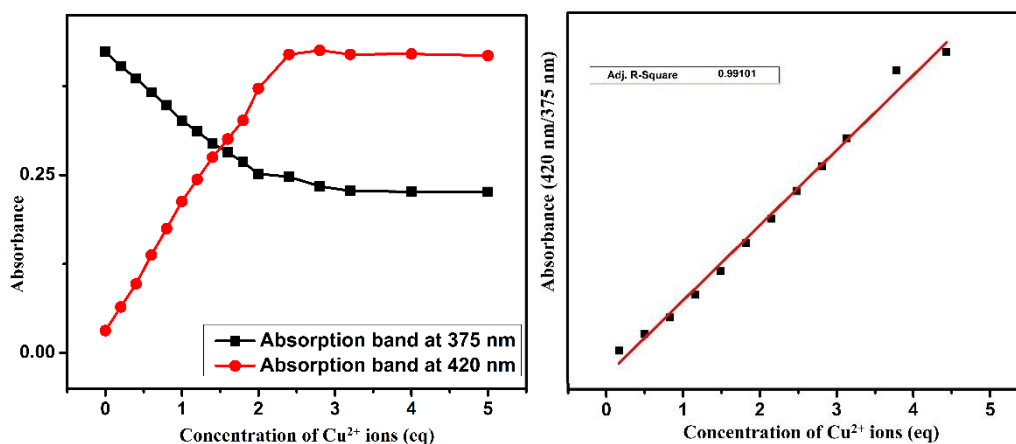

**Figure S6:** The compared absorption bands at 375 nm and 420 nm, which indicates the ratiometric response towards Cu<sup>2+</sup> ions (left) and linear fitting between the ratio of 420 nm/375 nm absorption bands and upon incremental of concentration of Cu<sup>2+</sup> ions

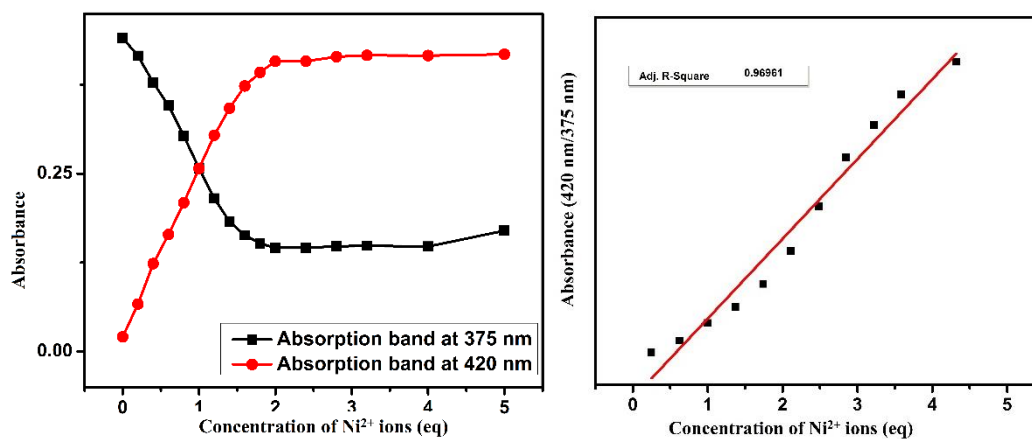

**Figure S7:** The compared absorption bands at 375 nm and 420 nm, which indicates the ratiometric response towards Ni<sup>2+</sup> ions (left) and linear fitting between the ratio of 420 nm/375 nm absorption bands and upon incremental of concentration of Ni<sup>2+</sup> ions

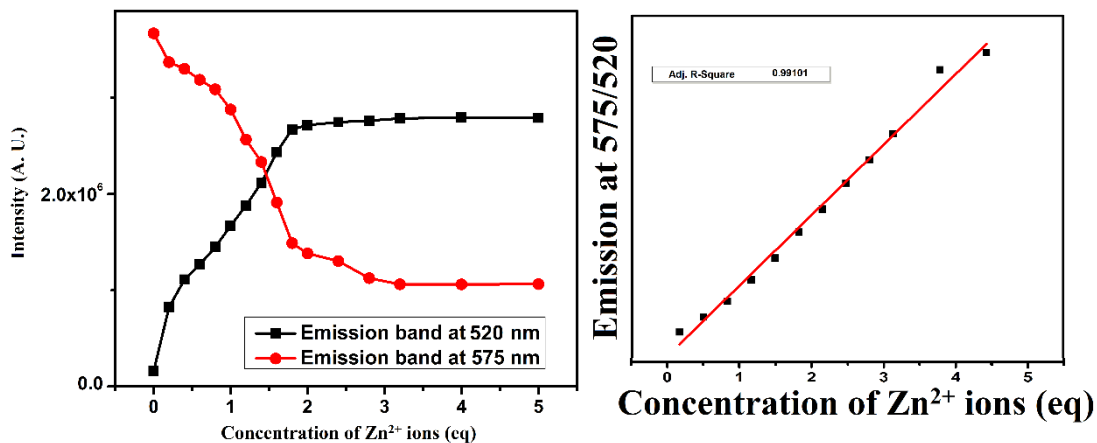



**Figure S8:** The compared emission bands at 375 nm and 420 nm, which indicates the ratiometric response towards  $Zn^{2+}$  ions (left) and linear fitting between the ratio of 420 nm/375 nm emission bands and upon incremental of concentration of  $Zn^{2+}$  ions

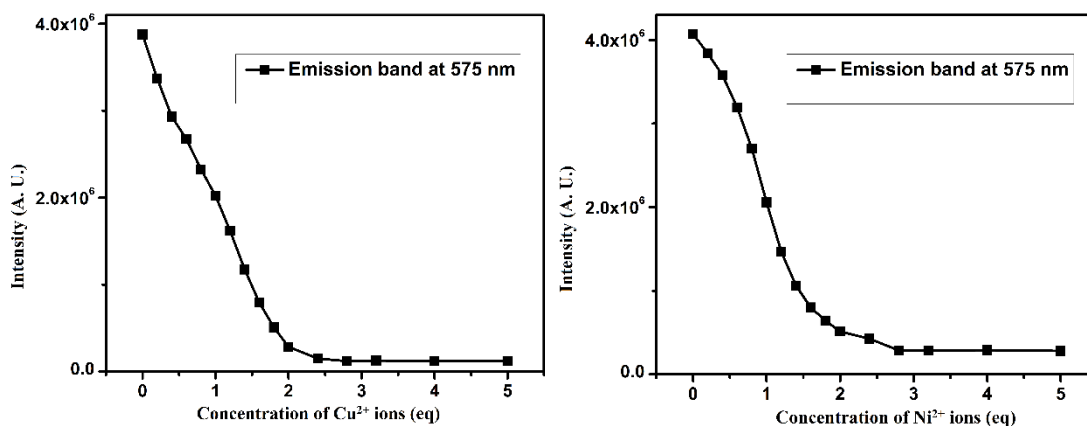

**Figure S9:** Change in emission spectra, upon addition of  $Cu^{2+}$  (left) and  $Ni^{2+}$  ions (right)

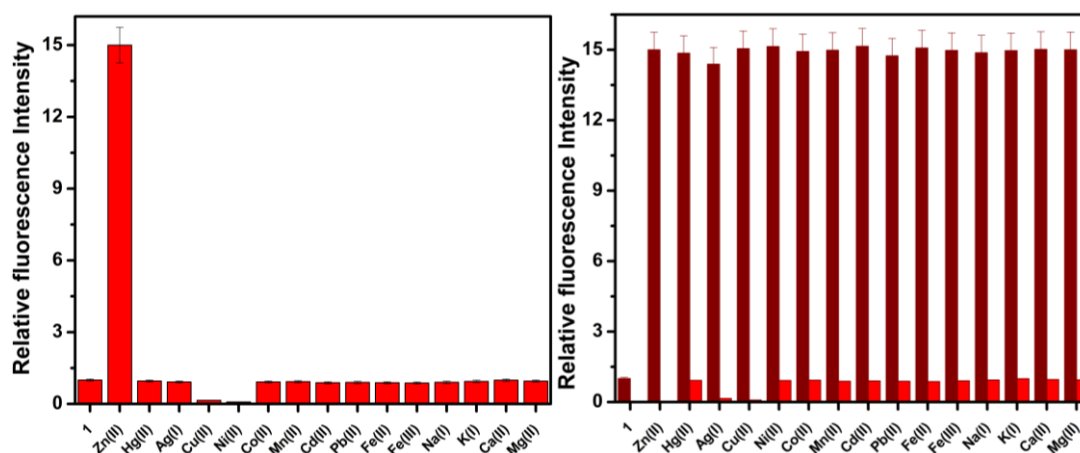

**Figure S10:** Examination of selectivity (left) and competitive (right) studies of **compound-1** ( $1\mu M$ ) toward various metal ions (with error bar). The competitive binding ability of **compound-1** ( $1\mu M$ ) were performed towards  $Zn^{2+}$  in the presence of other interfering metal ions and the emission band was monitored at 520 nm.

### 3. $^1\text{H}$ and $^{13}\text{C}$ Nuclear Magnetic Resonance (NMR) and High-Resolution Mass Spectroscopic (HR MS) studies

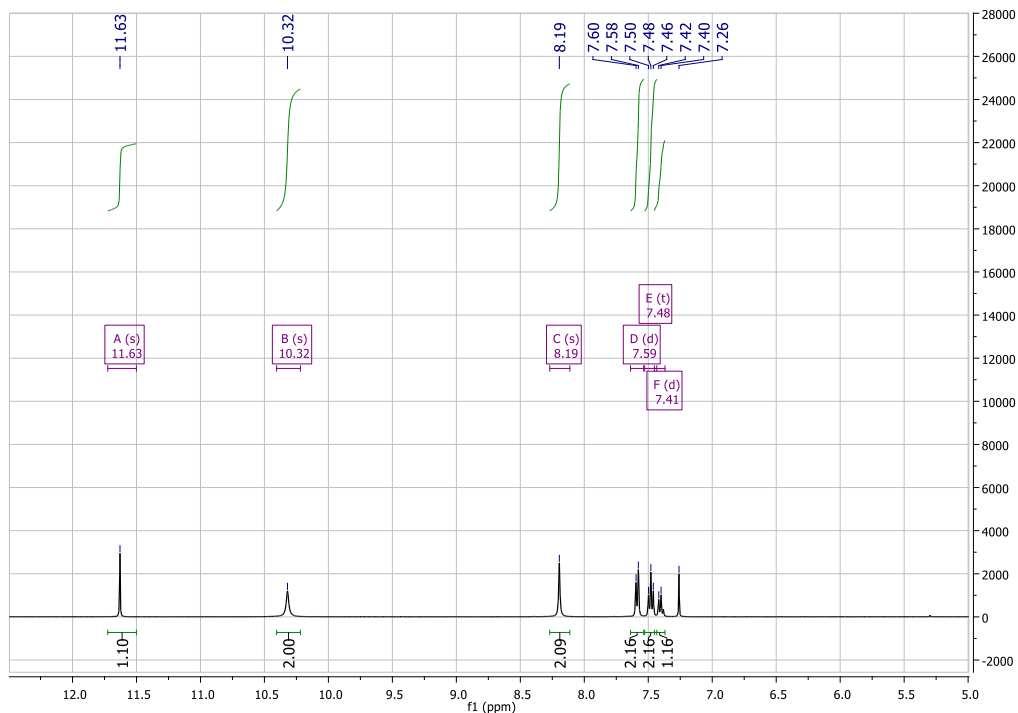

Figure S11:  $^1\text{H}$  NMR of A (400 MHz,  $\text{CDCl}_3$ )

| Compound Spectrum SmartFormula Report |                                           |                      |                                      |                           |           |
|---------------------------------------|-------------------------------------------|----------------------|--------------------------------------|---------------------------|-----------|
| <b>Analysis Info</b>                  |                                           |                      | Acquisition Date 27/10/2020 13:23:29 |                           |           |
| Analysis Name                         | D:\Data\Keynan\K_9954_SV-Cs_RC2_01_4213.d |                      | Operator                             | Larisa Panz               |           |
| Method                                | direct pos new.m                          |                      | Instrument                           | maXis impact 282001.00128 |           |
| Sample Name                           | K_9954_SV-Cs                              |                      | Comment                              |                           |           |
| <b>Acquisition Parameter</b>          |                                           |                      |                                      |                           |           |
| Source Type                           | ESI                                       | Ion Polarity         | Positive                             | Set Nebulizer             | 3.0 Bar   |
| Focus                                 | Active                                    | Set Capillary        | 4500 V                               | Set Dry Heater            | 180 °C    |
| Scan Begin                            | 50 m/z                                    | Set End Plate Offset | -500 V                               | Set Dry Gas               | 8.0 l/min |
| Scan End                              | 3000 m/z                                  | Set Charging Voltage | 2000 V                               | Set Divert Valve          | Source    |
|                                       |                                           | Set Corona           | 0 nA                                 | Set APCI Heater           | 0 °C      |

+MS, 1.5-1.6min #91-94

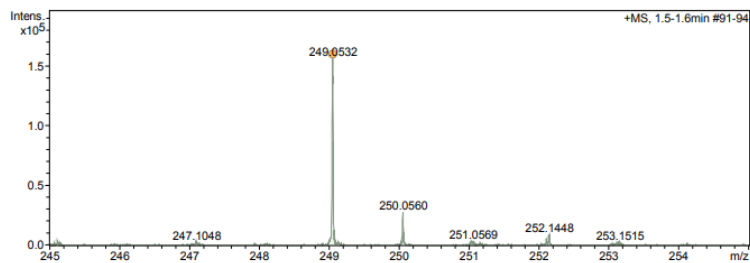

| Meas. m/z | # | Ion Formula | m/z      | err [ppm] | mSigma | # mSigma | Score  | rdb | e <sup>-</sup> Conf | N-Rule | err  [mDa] |
|-----------|---|-------------|----------|-----------|--------|----------|--------|-----|---------------------|--------|------------|
| 249.0532  | 1 | C14H10NaO3  | 249.0532 | -4.0      | 13.6   | 1        | 100.00 | 9.5 | even                | ok     | 1.0        |
|           | 1 | C14H10NaO3  | 249.0522 | -4.0      | 13.6   | 1        | 100.00 | 9.5 | even                | ok     | 1.0        |

Figure S12: HRMS of A

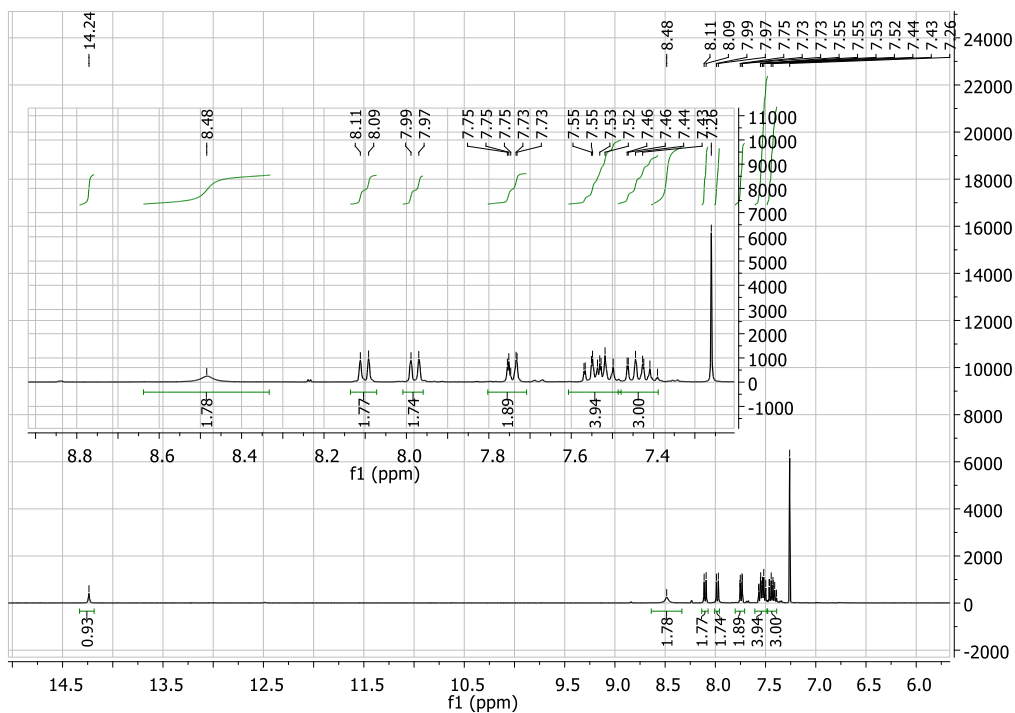

Figure S13:  $^1\text{H}$  NMR of compound-1 (400 MHz,  $\text{CDCl}_3$ )

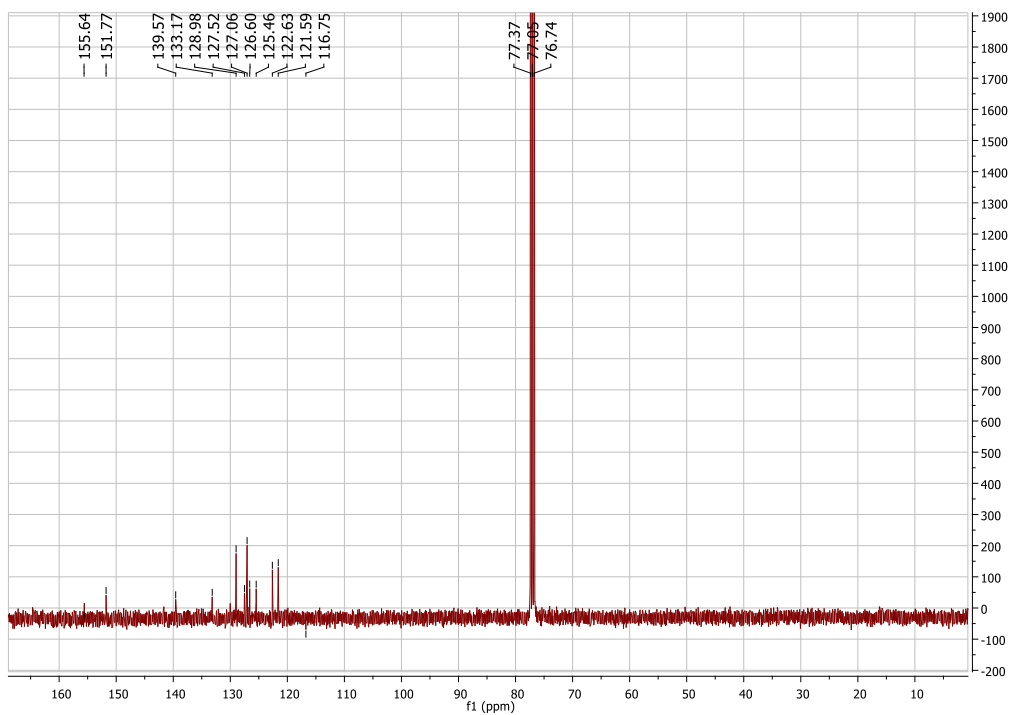

Figure S14:  $^{13}\text{C}$  NMR of compound-1 (101 MHz,  $\text{CDCl}_3$ )

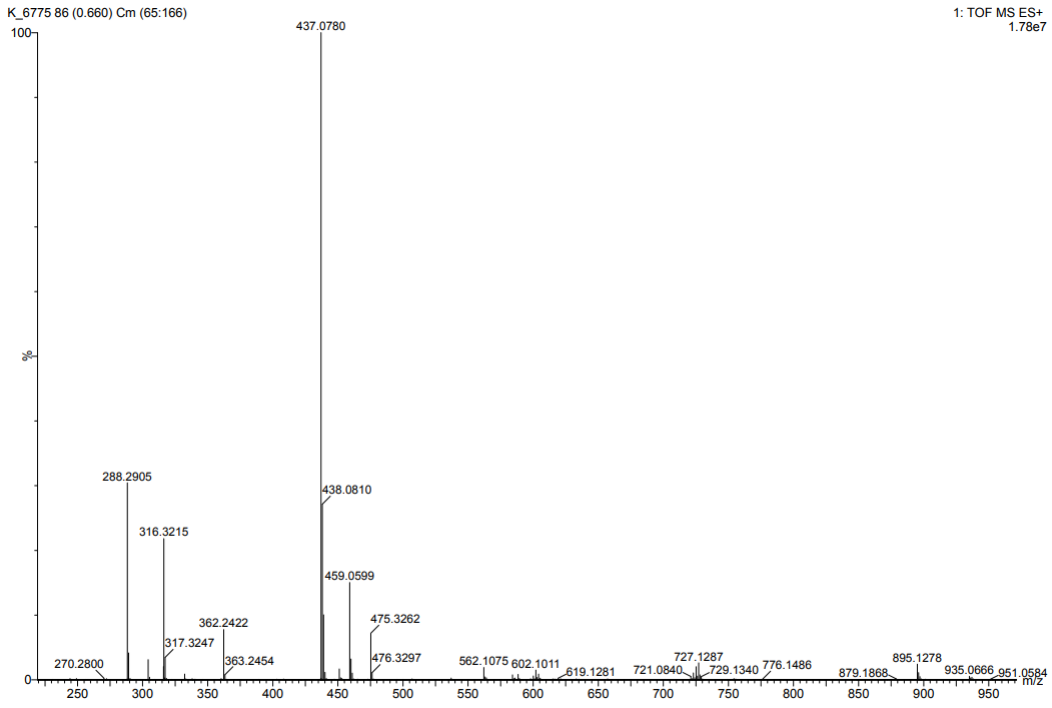

**Figure S15: HRMS of compound-1**

#### 4. Density Functional Theory results

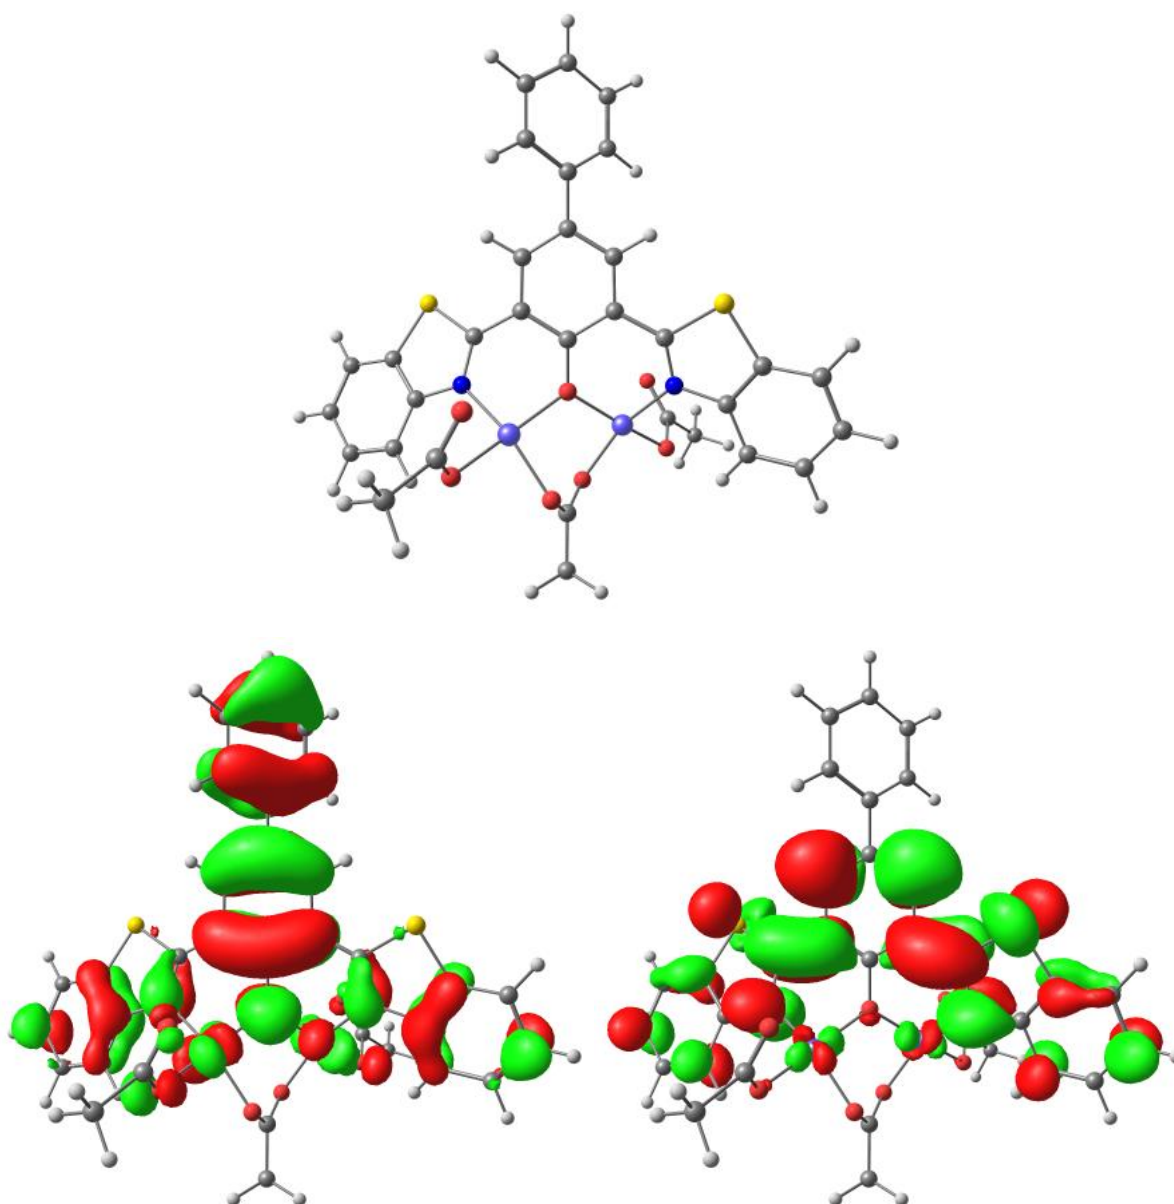

**Figure S16:** Density functional theory calculations of **compound-1+Ni<sup>2+</sup>** ions, molecular structure (top) HOMO (left) and LUMO (right)

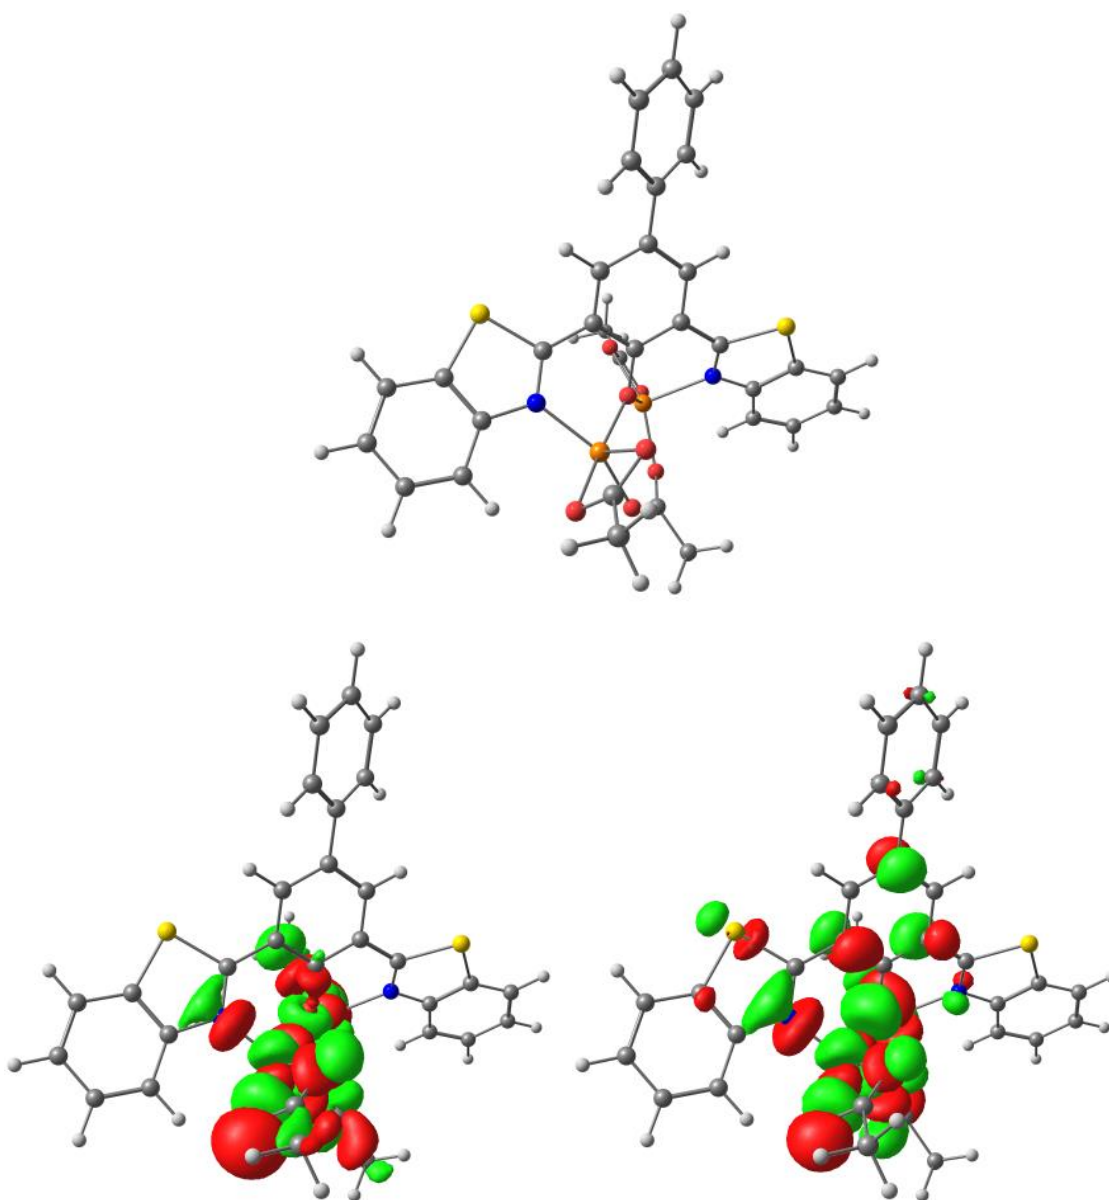

**Figure S17:** Density functional theory calculations of **compound-1+Ni<sup>2+</sup>** ions, molecular structure (top) HOMO (left) and LUMO (right)

**Table-S2:** Band gap of **compound-1**, **compound-1+Zn<sup>2+</sup>**, **compound-1+Cu<sup>2+</sup>** and **compound-1+Ni<sup>2+</sup>** ions obtained from DFT data

| Compound                          | HOMO (eV) | LUMO (eV) | LUMO-HOMO (eV) |
|-----------------------------------|-----------|-----------|----------------|
| <b>compound-1</b>                 | -6.2353   | -2.2158   | 4.0195         |
| <b>compound-1+Zn<sup>2+</sup></b> | -6.3549   | -2.4654   | 3.8894 eV      |
| <b>compound-1+Cu<sup>2+</sup></b> | -5.7753   | -3.4104   | 2.3649         |
| <b>compound-1+Ni<sup>2+</sup></b> | -6.4761   | -2.6805   | 3.7955         |

**Table S3:** Selected electronic transition from TDDFT of **compound-1**

|                   |           |           |           |          |              |
|-------------------|-----------|-----------|-----------|----------|--------------|
| Excited State 1:  | Singlet-A | 3.1842 eV | 389.37 nm | f=0.3326 | <S**2>=0.000 |
| 113 -> 114        | 0.69364   |           |           |          |              |
| Excited State 4:  | Singlet-A | 4.0395 eV | 306.93 nm | f=0.2015 | <S**2>=0.000 |
| 110 -> 114        | 0.55750   |           |           |          |              |
| Excited State 9:  | Singlet-A | 4.4048 eV | 281.48 nm | f=0.2330 | <S**2>=0.000 |
| 111 -> 115        | 0.52239   |           |           |          |              |
| Excited State 10: | Singlet-A | 4.4401 eV | 279.24 nm | f=0.3185 | <S**2>=0.000 |
| 113 -> 116        | 0.60032   |           |           |          |              |

**Compound-1-Zn<sup>2+</sup>**

|                   |           |           |           |          |              |
|-------------------|-----------|-----------|-----------|----------|--------------|
| Excited State 1:  | Singlet-A | 3.0143 eV | 411.32 nm | f=0.3032 | <S**2>=0.000 |
| 189 -> 190        | 0.69776   |           |           |          |              |
| Excited State 3:  | Singlet-A | 3.8039 eV | 325.94 nm | f=0.1024 | <S**2>=0.000 |
| 188 -> 190        | 0.62059   |           |           |          |              |
| Excited State 8:  | Singlet-A | 4.0035 eV | 309.69 nm | f=0.3702 | <S**2>=0.000 |
| 183 -> 190        | 0.51814   |           |           |          |              |
| Excited State 9:  | Singlet-A | 4.1981 eV | 295.33 nm | f=0.1164 | <S**2>=0.000 |
| 188 -> 191        | 0.54358   |           |           |          |              |
| Excited State 16: | Singlet-A | 4.4042 eV | 281.51 nm | f=0.5078 | <S**2>=0.000 |
| 189 -> 192        | 0.61891   |           |           |          |              |

**Compound-1+Ni**

|                   |           |           |           |          |              |
|-------------------|-----------|-----------|-----------|----------|--------------|
| Excited State 9:  | Singlet-A | 2.8988 eV | 427.70 nm | f=0.2085 | <S**2>=0.000 |
| 187 -> 188        | 0.69139   |           |           |          |              |
| Excited State 17: | Singlet-A | 3.5438 eV | 349.86 nm | f=0.0647 | <S**2>=0.000 |
| 184 -> 188        | 0.49622   |           |           |          |              |
| Excited State 18: | Singlet-A | 3.5580 eV | 348.47 nm | f=0.0253 | <S**2>=0.000 |
| 187 -> 190        | 0.54301   |           |           |          |              |

Excited State 19: Singlet-A 3.6332 eV 341.25 nm f=0.0021 <S\*\*2>=0.000  
183 -> 188 0.62797

Excited State 20: Singlet-A 3.7099 eV 334.19 nm f=0.0445 <S\*\*2>=0.000  
182 -> 188 0.37806

### Compound-1+Cu

Excited State 15: Singlet-A 2.2652 eV 547.35 nm f=0.0468 <S\*\*2>=0.000  
181 -> 189 0.29469

Excited State 16: Singlet-A 2.3998 eV 516.63 nm f=0.0252 <S\*\*2>=0.000  
169 -> 189 0.32584

Excited State 17: Singlet-A 2.4664 eV 502.70 nm f=0.0090 <S\*\*2>=0.000  
188 -> 190 0.68130

Excited State 18: Singlet-A 2.5276 eV 490.52 nm f=0.0022 <S\*\*2>=0.000  
167 -> 189 0.44917

Excited State 19: Singlet-A 2.7148 eV 456.70 nm f=0.0005 <S\*\*2>=0.000  
177 -> 189 0.70509

Excited State 20: Singlet-A 2.7289 eV 454.34 nm f=0.0038 <S\*\*2>=0.000  
165 -> 189 0.36985

**Table S4:** Computational results of optimized structure of **Compound-1**

|   |   |             |              |              |
|---|---|-------------|--------------|--------------|
| 1 | 6 | 3.994961304 | -2.231732169 | -0.053181004 |
| 2 | 6 | 4.977383381 | -1.203880094 | 0.007291001  |
| 3 | 6 | 6.347216460 | -1.500002115 | 0.013706001  |
| 4 | 6 | 6.731137518 | -2.853008215 | -0.041811003 |
| 5 | 6 | 5.761300456 | -3.882807298 | -0.102161008 |
| 6 | 6 | 4.391482337 | -3.582221275 | -0.108468008 |
| 7 | 6 | 2.558159193 | -0.452437034 | 0.009948001  |



|    |   |              |              |              |
|----|---|--------------|--------------|--------------|
| 8  | 1 | 7.096475564  | -0.715575056 | 0.060383005  |
| 9  | 1 | 7.787442618  | -3.108299238 | -0.037855003 |
| 10 | 1 | 6.084524460  | -4.919483378 | -0.143864011 |
| 11 | 1 | 3.637727280  | -4.362134330 | -0.153758012 |
| 12 | 6 | 1.276434099  | 0.237616018  | 0.024165002  |
| 13 | 6 | 1.189584090  | 1.646178128  | 0.068954005  |
| 14 | 6 | 0.076456006  | -0.550141040 | -0.006842001 |
| 15 | 6 | -0.046133004 | 2.312192178  | 0.070359005  |
| 16 | 1 | 2.105908160  | 2.228595170  | 0.125619010  |
| 17 | 6 | -1.184401090 | 0.112803009  | 0.015690001  |
| 18 | 6 | -1.217595093 | 1.517602117  | 0.040336003  |
| 19 | 1 | -2.187269168 | 2.007975152  | 0.031471002  |
| 20 | 6 | -0.127104009 | 3.799773292  | 0.113382008  |
| 21 | 6 | -1.176634091 | 4.451735342  | 0.805016060  |
| 22 | 6 | 0.844131064  | 4.601267349  | -0.534195040 |
| 23 | 6 | -1.253706095 | 5.854425439  | 0.846945065  |
| 24 | 1 | -1.920808145 | 3.862718296  | 1.335783100  |
| 25 | 6 | 0.771921061  | 6.004107457  | -0.488756037 |
| 26 | 1 | 1.642937124  | 4.128435317  | -1.100889083 |
| 27 | 6 | -0.278639021 | 6.639136508  | 0.201549015  |
| 28 | 1 | -2.065787158 | 6.332671494  | 1.389485108  |
| 29 | 1 | 1.525470114  | 6.598941527  | -0.999630074 |
| 30 | 1 | -0.336870026 | 7.724292616  | 0.234807018  |
| 31 | 6 | -2.443208189 | -0.650001052 | 0.000479000  |
| 32 | 6 | -4.029085310 | -2.201518170 | 0.456660035  |
| 33 | 6 | -4.812924368 | -1.436851108 | -0.457939035 |
| 34 | 6 | -4.579689348 | -3.344816253 | 1.069457081  |
| 35 | 6 | -6.132928462 | -1.800942137 | -0.765601060 |
| 36 | 6 | -5.897843427 | -3.710818284 | 0.762451058  |
| 37 | 1 | -3.971339303 | -3.916986301 | 1.762859134  |

|    |    |              |              |              |
|----|----|--------------|--------------|--------------|
| 38 | 6  | -6.668366512 | -2.945702225 | -0.147346011 |
| 39 | 1  | -6.731320507 | -1.221054091 | -1.461941110 |
| 40 | 1  | -6.335344474 | -4.591251352 | 1.225936095  |
| 41 | 1  | -7.688561563 | -3.245676250 | -0.373446028 |
| 42 | 8  | 0.121055009  | -1.906499144 | -0.089856007 |
| 43 | 1  | 1.093648086  | -2.217222172 | -0.095291007 |
| 44 | 16 | -3.850586293 | -0.041459003 | -1.089600081 |
| 45 | 16 | 4.179126317  | 0.425809033  | 0.071678006  |
| 46 | 7  | -2.727311209 | -1.723434133 | 0.680292052  |
| 47 | 7  | 2.671115204  | -1.771321133 | -0.050950004 |

**Table S5:** Computational results of optimized structure of **Compound-1+Zn<sup>2+</sup>** Complex

|    |   |              |              |              |
|----|---|--------------|--------------|--------------|
| 1  | 6 | -4.121628240 | -0.778462067 | -0.432917262 |
| 2  | 6 | -4.827035271 | 0.188608826  | -1.195306099 |
| 3  | 6 | -6.133002388 | -0.043309983 | -1.648990922 |
| 4  | 6 | -6.732476601 | -1.272344252 | -1.320489857 |
| 5  | 6 | -6.040526547 | -2.236182402 | -0.546990943 |
| 6  | 6 | -4.736091398 | -2.000630262 | -0.092602844 |
| 7  | 6 | -2.476772309 | 0.827115153  | -0.473038951 |
| 8  | 1 | -6.669539434 | 0.696454940  | -2.235281213 |
| 9  | 1 | -7.743457564 | -1.480387113 | -1.660741303 |
| 10 | 1 | -6.531847514 | -3.171085139 | -0.292597976 |
| 11 | 1 | -4.216197506 | -2.716299099 | 0.534821983  |
| 12 | 6 | -1.208911246 | 1.516855363  | -0.221471262 |
| 13 | 6 | -1.176941003 | 2.926968266  | -0.224735757 |
| 14 | 6 | 0.002106125  | 0.777146004  | -0.000494781 |
| 15 | 6 | 0.006724784  | 3.656670354  | -0.005463226 |
| 16 | 1 | -2.099151953 | 3.471550394  | -0.409956261 |
| 17 | 6 | 1.215447114  | 1.513718929  | 0.217969167  |
| 18 | 6 | 1.188046846  | 2.923919147  | 0.216357822  |

|    |    |              |              |              |
|----|----|--------------|--------------|--------------|
| 19 | 1  | 2.111992968  | 3.466169190  | 0.399753194  |
| 20 | 6  | 0.009132012  | 5.146895401  | -0.008017035 |
| 21 | 6  | 1.117041842  | 5.871221578  | -0.510179257 |
| 22 | 6  | -1.096429330 | 5.876503296  | 0.491668107  |
| 23 | 6  | 1.121221284  | 7.276631683  | -0.510615299 |
| 24 | 1  | 1.966403078  | 5.336841458  | -0.929551168 |
| 25 | 6  | -1.096059965 | 7.281913401  | 0.487314037  |
| 26 | 1  | -1.947499279 | 5.346284626  | 0.912857213  |
| 27 | 6  | 0.013730033  | 7.990038816  | -0.012860066 |
| 28 | 1  | 1.980023042  | 7.812351679  | -0.907914169 |
| 29 | 1  | -1.953113320 | 7.821762567  | 0.882795183  |
| 30 | 1  | 0.015491135  | 9.077212836  | -0.014701073 |
| 31 | 6  | 2.481000435  | 0.820704171  | 0.472181155  |
| 32 | 6  | 4.121028153  | -0.789931984 | 0.437542271  |
| 33 | 6  | 4.828995344  | 0.177348992  | 1.197287339  |
| 34 | 6  | 4.732227346  | -2.014801100 | 0.101059096  |
| 35 | 6  | 6.134036400  | -0.057013028 | 1.652369189  |
| 36 | 6  | 6.035726380  | -2.252805976 | 0.556825173  |
| 37 | 1  | 4.210796194  | -2.730573126 | -0.524933777 |
| 38 | 6  | 6.730082603  | -1.288768327 | 1.327898338  |
| 39 | 1  | 6.672400695  | 0.682942928  | 2.236738038  |
| 40 | 1  | 6.524472370  | -3.189853998 | 0.305378136  |
| 41 | 1  | 7.740240695  | -1.498792956 | 1.669369009  |
| 42 | 8  | 0.000031751  | -0.570510226 | 0.001839949  |
| 43 | 16 | 3.803510161  | 1.648980868  | 1.443967018  |
| 44 | 16 | -3.797231473 | 1.656371886  | -1.446965865 |
| 45 | 7  | 2.817384125  | -0.394984249 | 0.068207243  |
| 46 | 7  | -2.816793034 | -0.386215782 | -0.065178233 |
| 47 | 30 | 1.474247069  | -1.599366267 | -1.027498173 |
| 48 | 30 | -1.477866112 | -1.589738945 | 1.036070844  |

|    |   |              |              |              |
|----|---|--------------|--------------|--------------|
| 49 | 8 | 1.038392874  | -3.450693402 | -0.452115283 |
| 50 | 6 | -0.009444226 | -4.056120330 | 0.004351954  |
| 51 | 8 | -1.052327169 | -3.443360063 | 0.462518908  |
| 52 | 6 | -0.028451215 | -5.571686617 | -0.024379196 |
| 53 | 1 | -0.483664831 | -5.901503217 | -0.967758295 |
| 54 | 1 | 0.990685957  | -5.963075635 | 0.019268931  |
| 55 | 1 | -0.633581804 | -5.957704486 | 0.799763039  |
| 56 | 8 | 3.010674052  | -2.152686170 | -2.597378154 |
| 57 | 6 | 2.213120328  | -1.594282990 | -3.452057092 |
| 58 | 8 | 1.095167243  | -1.063493867 | -3.000929253 |
| 59 | 6 | 2.519543060  | -1.554780967 | -4.929170185 |
| 60 | 1 | 1.861331231  | -2.260701301 | -5.451869246 |
| 61 | 1 | 2.312315133  | -0.555964201 | -5.327143227 |
| 62 | 1 | 3.560005017  | -1.831886221 | -5.112602599 |
| 63 | 8 | -3.014004165 | -2.132103291 | 2.610214407  |
| 64 | 6 | -2.217365917 | -1.565283019 | 3.460196367  |
| 65 | 8 | -1.099789077 | -1.037392200 | 3.004727158  |
| 66 | 6 | -2.524735347 | -1.511277305 | 4.936634230  |
| 67 | 1 | -3.558761450 | -1.808566967 | 5.124491624  |
| 68 | 1 | -1.849906294 | -2.193031172 | 5.469907311  |
| 69 | 1 | -2.340690146 | -0.501802910 | 5.319236260  |

**Table S6:** Computational results of optimized structure of **Compound-1+Cu<sup>2+</sup>** Complex

|   |   |              |              |              |
|---|---|--------------|--------------|--------------|
| 1 | 6 | -4.132728262 | -0.570840961 | -0.224804021 |
| 2 | 6 | -4.787656546 | 0.360659167  | -1.077563103 |
| 3 | 6 | -6.116187251 | 0.168637147  | -1.483590223 |
| 4 | 6 | -6.786390766 | -0.976837918 | -1.016621993 |
| 5 | 6 | -6.141315233 | -1.905690043 | -0.162193885 |
| 6 | 6 | -4.813494155 | -1.713420369 | 0.241961005  |
| 7 | 6 | -2.390023224 | 0.887438184  | -0.445769919 |

|    |   |              |              |              |
|----|---|--------------|--------------|--------------|
| 8  | 1 | -6.618479650 | 0.875935988  | -2.136503400 |
| 9  | 1 | -7.816838573 | -1.149276145 | -1.316662847 |
| 10 | 1 | -6.685572446 | -2.779270133 | 0.185879859  |
| 11 | 1 | -4.301819443 | -2.409763123 | 0.898439250  |
| 12 | 6 | -1.064179152 | 1.487285996  | -0.264110248 |
| 13 | 6 | -0.916654060 | 2.884736217  | -0.348834172 |
| 14 | 6 | 0.081776935  | 0.677765987  | 0.024532128  |
| 15 | 6 | 0.322467915  | 3.529661464  | -0.157150826 |
| 16 | 1 | -1.791330077 | 3.486951039  | -0.578769095 |
| 17 | 6 | 1.343632895  | 1.323616236  | 0.225917939  |
| 18 | 6 | 1.441651338  | 2.722883122  | 0.132353051  |
| 19 | 1 | 2.407954395  | 3.194274216  | 0.290035171  |
| 20 | 6 | 0.444589853  | 5.009378639  | -0.258541187 |
| 21 | 6 | 1.620062389  | 5.607897158  | -0.773992107 |
| 22 | 6 | -0.612032118 | 5.855668529  | 0.157511196  |
| 23 | 6 | 1.736051163  | 7.004858419  | -0.869028108 |
| 24 | 1 | 2.432874939  | 4.981739182  | -1.133859095 |
| 25 | 6 | -0.497786984 | 7.252651486  | 0.061299893  |
| 26 | 1 | -1.513311992 | 5.424532478  | 0.586615206  |
| 27 | 6 | 0.677433135  | 7.834943314  | -0.451981930 |
| 28 | 1 | 2.643467376  | 7.443251606  | -1.277019004 |
| 29 | 1 | -1.317718026 | 7.884220829  | 0.394327011  |
| 30 | 1 | 0.766367192  | 8.915879922  | -0.526248782 |
| 31 | 6 | 2.530600219  | 0.519239829  | 0.509495030  |
| 32 | 6 | 3.964879059  | -1.273385144 | 0.514441779  |
| 33 | 6 | 4.753249442  | -0.396581835 | 1.306316903  |
| 34 | 6 | 4.435913487  | -2.563868005 | 0.199087065  |
| 35 | 6 | 6.002663385  | -0.784821190 | 1.810075122  |
| 36 | 6 | 5.681914238  | -2.955600989 | 0.705725067  |
| 37 | 1 | 3.853065494  | -3.204286249 | -0.453140299 |

|    |    |              |              |              |
|----|----|--------------|--------------|--------------|
| 38 | 6  | 6.457419263  | -2.079993091 | 1.505329353  |
| 39 | 1  | 6.602679476  | -0.114145120 | 2.417583304  |
| 40 | 1  | 6.063036689  | -3.946192223 | 0.473939082  |
| 41 | 1  | 7.420719768  | -2.409719201 | 1.885456951  |
| 42 | 8  | -0.009794013 | -0.680709271 | 0.112041111  |
| 43 | 16 | 3.901637086  | 1.189530130  | 1.523670107  |
| 44 | 16 | -3.665105440 | 1.719044994  | -1.499795217 |
| 45 | 7  | 2.736883036  | -0.718098819 | 0.100815145  |
| 46 | 7  | -2.807162008 | -0.234030226 | 0.094321082  |
| 47 | 29 | 1.302060201  | -1.729340137 | -0.931982208 |
| 48 | 29 | -1.423308996 | -1.448315267 | 1.293230349  |
| 49 | 8  | 0.148081257  | -3.328513254 | -1.132901285 |
| 50 | 6  | -1.018359282 | -3.676351514 | -0.690447191 |
| 51 | 8  | -1.586271247 | -3.180266365 | 0.363092853  |
| 52 | 6  | -1.765732186 | -4.753571181 | -1.456475180 |
| 53 | 1  | -2.429470213 | -4.278180566 | -2.191103909 |
| 54 | 1  | -1.058886321 | -5.392899321 | -1.992013140 |
| 55 | 1  | -2.380418128 | -5.343439240 | -0.770245003 |
| 56 | 8  | 2.631244440  | -2.491924241 | -2.300444099 |
| 57 | 6  | 2.329756286  | -1.643599135 | -3.267578494 |
| 58 | 8  | 1.471894347  | -0.711632273 | -3.035826376 |
| 59 | 6  | 2.991326274  | -1.822729338 | -4.615343205 |
| 60 | 1  | 2.577753087  | -2.714086080 | -5.104196618 |
| 61 | 1  | 2.806178267  | -0.948511060 | -5.244747154 |
| 62 | 1  | 4.068039518  | -1.982205369 | -4.490821448 |
| 63 | 8  | -2.616712174 | -1.859892927 | 3.095786392  |
| 64 | 6  | -1.975054067 | -0.881297082 | 3.652863453  |
| 65 | 8  | -1.063837303 | -0.271553126 | 2.922303039  |
| 66 | 6  | -2.216947338 | -0.458810963 | 5.077659437  |
| 67 | 1  | -3.194207010 | -0.812189179 | 5.417063671  |

|    |   |              |              |             |
|----|---|--------------|--------------|-------------|
| 68 | 1 | -1.441797920 | -0.896718895 | 5.720213441 |
| 69 | 1 | -2.150529243 | 0.630212003  | 5.165947370 |

**Table S7:** Computational results of optimized structure of **Compound-1+Ni<sup>2+</sup>** Complex

|    |   |              |              |              |
|----|---|--------------|--------------|--------------|
| 1  | 6 | 4.040978452  | -0.838231050 | 0.556081150  |
| 2  | 6 | 4.776523186  | 0.181815248  | 1.212105889  |
| 3  | 6 | 6.055396427  | -0.041165227 | 1.740807937  |
| 4  | 6 | 6.599615540  | -1.330258998 | 1.618251015  |
| 5  | 6 | 5.870985565  | -2.360938055 | 0.977703123  |
| 6  | 6 | 4.597113578  | -2.129711410 | 0.441907983  |
| 7  | 6 | 2.475344060  | 0.843811224  | 0.400443241  |
| 8  | 1 | 6.606280527  | 0.750886112  | 2.238899198  |
| 9  | 1 | 7.586951805  | -1.536093073 | 2.022809139  |
| 10 | 1 | 6.308015592  | -3.352268021 | 0.894436024  |
| 11 | 1 | 4.054095168  | -2.901783133 | -0.086827932 |
| 12 | 6 | 1.211952957  | 1.523794993  | 0.148148992  |
| 13 | 6 | 1.187293297  | 2.934084112  | 0.138441235  |
| 14 | 6 | -0.003043828 | 0.784744989  | -0.004224951 |
| 15 | 6 | -0.001798144 | 3.669307107  | -0.001827778 |
| 16 | 1 | 2.122554288  | 3.473252228  | 0.261549030  |
| 17 | 6 | -1.218107289 | 1.524830064  | -0.149898981 |
| 18 | 6 | -1.191810883 | 2.935277407  | -0.139713906 |
| 19 | 1 | -2.126763364 | 3.475580079  | -0.260017062 |
| 20 | 6 | -0.000721798 | 5.158683354  | -0.003156013 |
| 21 | 6 | -1.064687162 | 5.885215670  | 0.582785021  |
| 22 | 6 | 1.064521000  | 5.882094583  | -0.590656003 |
| 23 | 6 | -1.064969214 | 7.290589791  | 0.579823216  |
| 24 | 1 | -1.878845410 | 5.353480378  | 1.069981051  |
| 25 | 6 | 1.067275897  | 7.287469762  | -0.590724267 |
| 26 | 1 | 1.877697095  | 5.347809186  | -1.076698957 |

|    |    |              |              |              |
|----|----|--------------|--------------|--------------|
| 27 | 6  | 0.001774860  | 7.999083513  | -0.006219949 |
| 28 | 1  | -1.887991181 | 7.829902372  | 1.042370170  |
| 29 | 1  | 1.891247208  | 7.824319552  | -1.054441232 |
| 30 | 1  | 0.002717854  | 9.086229487  | -0.007397898 |
| 31 | 6  | -2.484475013 | 0.846519024  | -0.391498029 |
| 32 | 6  | -4.056552138 | -0.831334812 | -0.529669913 |
| 33 | 6  | -4.797008167 | 0.191307101  | -1.176140887 |
| 34 | 6  | -4.615134180 | -2.121337180 | -0.410228258 |
| 35 | 6  | -6.082663344 | -0.027455832 | -1.689875156 |
| 36 | 6  | -5.895975431 | -2.348312944 | -0.931050856 |
| 37 | 1  | -4.067876532 | -2.895577472 | 0.110891209  |
| 38 | 6  | -6.629229357 | -1.315031923 | -1.561962961 |
| 39 | 1  | -6.636992387 | 0.766663002  | -2.180800299 |
| 40 | 1  | -6.334679246 | -3.338548042 | -0.843638183 |
| 41 | 1  | -7.621889675 | -1.517616849 | -1.954964911 |
| 42 | 8  | -0.002718913 | -0.580282013 | -0.009976049 |
| 43 | 16 | -3.833955316 | 1.718712141  | -1.256637213 |
| 44 | 16 | 3.816702550  | 1.711942906  | 1.281951994  |
| 45 | 7  | -2.771518216 | -0.410481205 | -0.094069194 |
| 46 | 7  | 2.762717998  | -0.413477935 | 0.105632775  |
| 47 | 28 | -1.479993934 | -1.574474298 | 0.731850019  |
| 48 | 28 | 1.482879008  | -1.566529231 | -0.750088113 |
| 49 | 8  | -0.408324807 | -3.150879035 | 1.028421058  |
| 50 | 6  | -0.014913802 | -3.757333096 | -0.056829932 |
| 51 | 8  | 0.409718131  | -3.125005443 | -1.114060987 |
| 52 | 6  | -0.029712773 | -5.268832656 | -0.078494978 |
| 53 | 1  | 0.848274834  | -5.639037651 | 0.467540800  |
| 54 | 1  | -0.922803100 | -5.644022501 | 0.429399291  |
| 55 | 1  | 0.020907264  | -5.630565523 | -1.107900835 |
| 56 | 8  | -2.787550170 | -2.404326356 | 1.778500174  |



|    |   |              |              |              |
|----|---|--------------|--------------|--------------|
| 57 | 6 | -2.947414087 | -1.739670206 | 2.937161278  |
| 58 | 8 | -2.346696308 | -0.657325987 | 3.186749315  |
| 59 | 6 | -3.899071106 | -2.412543420 | 3.910730468  |
| 60 | 1 | -3.477984131 | -3.375077148 | 4.225862399  |
| 61 | 1 | -4.048157271 | -1.773411077 | 4.784386231  |
| 62 | 1 | -4.859671220 | -2.614583294 | 3.422733263  |
| 63 | 8 | 2.808130402  | -2.384237200 | -1.783512012 |
| 64 | 6 | 2.999523229  | -1.702494975 | -2.927316465 |
| 65 | 8 | 2.413761057  | -0.611433090 | -3.173972331 |
| 66 | 6 | 3.967422285  | -2.368752415 | -3.889564437 |
| 67 | 1 | 4.910195476  | -2.599015429 | -3.379970450 |
| 68 | 1 | 3.539109395  | -3.316178133 | -4.239074368 |
| 69 | 1 | 4.151366414  | -1.712441920 | -4.743637466 |
